# Supplementary material
Source: publisher site journal article supplement (https://www.spandidos-publications.com/6664/downloadSupplementary)
Supplement: Supplementary file 1 [file downloadSupplementary]

## Sheet: Fig5
Table SIV. Raw data for expression of Cul3-related genes.
Expression of Cul 3-related genes after Cul3 knockdown (by RT-qPCR)
213A-FR
Gene	Sample	Ct1	Ct2	Ct3	∆Ct-1	∆Ct-2	∆Ct-3	2^∆Ct-1	2^∆Ct-2	2^∆Ct-3	AVG	SD	Fold-1	Fold-2	Fold-3	AVG	SD	p value
ACTB	siNC	16.04	15.77	15.75
	siCul3#1	15.35	15.51	15.64
	siCul3#2	14.13	14.35	14.27
ARIH1	siNC	19.97	19.9	20	-4.12	-4.05	-4.15	0.0575117	0.060371	0.0563282	0.0580703	0.00207851	0.990381	1.03962	0.969999	1	0.035793
	siCul3#1	20.93	20.98	20.85	-5.43	-5.48	-5.35	0.0231957	0.0224056	0.0245183	0.0233732	0.00106747	0.399441	0.385835	0.422217	0.402498	0.0183825	1.3574e-05	***
	siCul3#2	19.69	19.8	19.83	-5.44	-5.55	-5.58	0.0230355	0.0213444	0.0209051	0.0217617	0.0011248	0.396682	0.367561	0.359997	0.374747	0.0193696	1.18548e-05	***
COMMD3	siNC	19.5	19.25	19.38	-3.65	-3.4	-3.53	0.07966	0.0947323	0.0865693	0.0869872	0.00754481	0.915767	1.08904	0.995196	1	0.0867347
	siCul3#1	19.7	19.8	19.69	-4.2	-4.3	-4.19	0.0544094	0.0507658	0.0547879	0.053321	0.00222098	0.625487	0.5836	0.629838	0.612975	0.0255322	0.001766	**
	siCul3#2	18.97	18.83	18.92	-4.72	-4.58	-4.67	0.0379436	0.0418102	0.0392817	0.0396785	0.00196363	0.436197	0.480648	0.45158	0.456142	0.0225738	0.00046334	***
EGLN1	siNC	31.75	31.87	31.45	-15.9	-16.02	-15.6	1.6354e-05	1.50487e-05	2.01341e-05	1.71789e-05	2.64115e-06	0.951978	0.875999	1.17202	1	0.153744
	siCul3#1	31.86	32.2	31.93	-16.36	-16.7	-16.43	1.18891e-05	9.39289e-06	1.1326e-05	1.08693e-05	1.30927e-06	0.692075	0.546768	0.659297	0.632713	0.0762139	0.0207033	*
	siCul3#2	32.83	31.22	32.85	-18.58	-16.97	-18.6	2.55189e-06	7.7897e-06	2.51676e-06	4.28612e-06	3.03424e-06	0.148548	0.453445	0.146503	0.249499	0.176626	0.00515272	**
Expression of Cul 3-related genes after Cul3 knockdown (by RT-qPCR)
213A-FR
Gene	Sample	Ct1	Ct2	Ct3	∆Ct-1	∆Ct-2	∆Ct-3	2^∆Ct-1	2^∆Ct-2	2^∆Ct-3	AVG	SD	Fold-1	Fold-2	Fold-3	AVG	SD	p value
ACTB	siNC	16.46	16.58	16.46	16.5
	siCul3#1	16.3	16.44	16.31	16.35
	siCul3#2	16.58	16.53	16.4	16.5033
DHX9	siNC	20.21	20.24	20.18	-3.71	-3.74	-3.68	0.076415	0.0748424	0.0780207	0.076426	0.00158915	0.999856	0.979279	1.02086	1	0.0207933
	siCul3#1	20.48	20.47	20.46	-4.13	-4.12	-4.11	0.0571145	0.0575117	0.0579118	0.0575126	0.000398645	0.747317	0.752515	0.757749	0.752527	0.00521609	3.69224e-05	***
	siCul3#2	20.79	20.73	20.7	-4.29	-4.23	-4.2	0.0511189	0.0532897	0.0544094	0.0529393	0.00167301	0.668867	0.697271	0.711922	0.692687	0.0218906	6.07989e-05	***
PSMD13	siNC	20.4	20.43	20.44	-3.9	-3.93	-3.94	0.0669858	0.0656073	0.0651541	0.0659157	0.000954027	1.01623	0.99532	0.988445	1	0.0144734
	siCul3#1	20.47	20.6	20.49	-4.12	-4.25	-4.14	0.0575117	0.052556	0.0567199	0.0555959	0.00266221	0.872504	0.797321	0.860492	0.843439	0.0403881	0.00320566	**
	siCul3#2	20.6	20.47	20.54	-4.1	-3.97	-4.04	0.0583146	0.0638133	0.0607909	0.0609729	0.00275386	0.884683	0.968103	0.922252	0.925013	0.0417785	0.0424936	*
SNRPG	siNC	17.87	17.93	17.86	-1.37	-1.43	-1.36	0.386891	0.371131	0.389582	0.382535	0.00996732	1.01139	0.970189	1.01842	1	0.026056
	siCul3#1	18.12	18.02	17.97	-1.77	-1.67	-1.62	0.293209	0.314253	0.325335	0.310933	0.0163188	0.766489	0.821503	0.850473	0.812821	0.0426596	0.00291377	**
	siCul3#2	18.34	18.35	18.24	-1.84	-1.85	-1.74	0.279322	0.277392	0.29937	0.285361	0.0121699	0.730187	0.725143	0.782595	0.745975	0.0318139	0.000432345	***
Expression of Cul 3-related genes after Cul3 knockdown (by RT-qPCR)
213A-GR
Gene	Sample	Ct1	Ct2	Ct3	∆Ct-1	∆Ct-2	∆Ct-3	2^∆Ct-1	2^∆Ct-2	2^∆Ct-3	AVG	SD	Fold-1	Fold-2	Fold-3	AVG	SD	p value
ACTB	siNC	18.17	17.85	17.78
	siCul3#1	17.14	17.4	17.36
	siCul3#2	16.05	16.03	16.02
ARIH1	siNC	23.14	23.22	23.2	-5.21	-5.29	-5.27	0.0270168	0.0255594	0.0259162	0.0261642	0.000759648	1.03259	0.976888	0.990524	1	0.0290339
	siCul3#1	23.1	23.14	23.1	-5.8	-5.84	-5.8	0.0179484	0.0174576	0.0179484	0.0177848	0.000283364	0.685992	0.667234	0.685992	0.67974	0.0108302	5.72391e-05	***
	siCul3#2	21.73	21.79	21.73	-5.7	-5.76	-5.7	0.0192366	0.018453	0.0192366	0.0189754	0.000452424	0.735228	0.705278	0.735228	0.725245	0.0172917	0.000147563	***
COMMD3	siNC	21.74	21.8	21.85	-3.81	-3.87	-3.92	0.0712977	0.0683934	0.0660636	0.0685849	0.0026223	1.03955	0.997207	0.963239	1	0.0382344
	siCul3#1	22.02	22	22.07	-4.72	-4.7	-4.77	0.0379436	0.0384733	0.0366511	0.0376893	0.00093732	0.553235	0.560958	0.53439	0.549528	0.0136666	4.32207e-05	***
	siCul3#2	21.27	21.17	21.12	-5.24	-5.14	-5.09	0.0264608	0.02836	0.0293601	0.0280603	0.0014727	0.385811	0.413502	0.428084	0.409132	0.0214726	1.99795e-05	***
EGLN1	siNC	30.43	30.93	30.68	-12.5	-13	-12.75	0.000172633	0.00012207	0.000145167	0.000146624	2.5313e-05	1.17739	0.832542	0.990065	1	0.17264
	siCul3#1	32.44	31.86	32.46	-15.14	-14.56	-15.16	2.76953e-05	4.14003e-05	2.7314e-05	3.21365e-05	8.02491e-06	0.188887	0.282358	0.186287	0.219177	0.0547314	0.00171882	**
	siCul3#2	30.75	30.08	30.61	-14.72	-14.05	-14.58	3.70543e-05	5.89561e-05	4.08303e-05	4.56136e-05	1.17082e-05	0.252717	0.402091	0.27847	0.311093	0.079852	0.00329617	**
Expression of Cul 3-related genes after Cul3 knockdown (by RT-qPCR)
213A-GR
Gene	Sample	Ct1	Ct2	Ct3	∆Ct-1	∆Ct-2	∆Ct-3	2^∆Ct-1	2^∆Ct-2	2^∆Ct-3	AVG	SD	Fold-1	Fold-2	Fold-3	AVG	SD	p value
ACTB	siNC	15.24	14.88	14.99	15.0367
	siCul3#1	14.45	14.48	14.6	14.51
	siCul3#2	14.53	14.37	14.43	14.4433
DHX9	siNC	20.02	20.18	20.21	-4.98	-5.14	-5.17	0.0316862	0.02836	0.0277763	0.0292742	0.00210918	1.0824	0.968771	0.948834	1	0.0720493
	siCul3#1	20.17	20.18	20.24	-5.66	-5.67	-5.73	0.0197774	0.0196408	0.0188407	0.0194197	0.000505999	0.675594	0.670927	0.643596	0.663372	0.0172848	0.0014095	***
	siCul3#2	20.67	20.51	20.43	-6.23	-6.07	-5.99	0.0133224	0.014885	0.0157337	0.014647	0.00122311	0.455091	0.508467	0.537459	0.500339	0.0417813	0.000484366	***
PSMD13	siNC	19.7	19.84	19.97	-4.66	-4.8	-4.93	0.0395549	0.0358968	0.0328036	0.0360851	0.00337956	1.09616	0.994782	0.909063	1	0.0936552
	siCul3#1	19.76	19.78	19.71	-5.25	-5.27	-5.2	0.026278	0.0259162	0.0272047	0.0264663	0.000664554	0.728223	0.718197	0.753904	0.733441	0.0184163	0.00841789	**
	siCul3#2	19.75	19.73	19.71	-5.31	-5.29	-5.27	0.0252076	0.0255594	0.0259162	0.0255611	0.000354343	0.698558	0.70831	0.718197	0.708355	0.00981965	0.00582971	***
SNRPG	siNC	17.86	17.84	17.74	-2.82	-2.8	-2.7	0.14161	0.143587	0.153893	0.146364	0.00659517	0.967525	0.981031	1.05144	1	0.0450602
	siCul3#1	17.72	17.76	17.78	-3.21	-3.25	-3.27	0.108067	0.105112	0.103665	0.105615	0.00224374	0.738347	0.718157	0.70827	0.721591	0.0153299	0.000534299	***
	siCul3#2	17.92	17.87	17.85	-3.48	-3.43	-3.41	0.0896222	0.0927827	0.0940779	0.0921609	0.00229201	0.612326	0.633919	0.642769	0.629671	0.0156597	0.000176979	***

## Sheet: ANOVA-post hoc
Expression of Cul 3-related genes after Cul3 knockdown (by RT-qPCR)																					Expression of Cul 3-related genes after Cul3 knockdown (by RT-qPCR)
213A-FR																					213A-GR
Gene	Sample	Ct1	Ct2	Ct3	∆Ct-1	∆Ct-2	∆Ct-3	2^∆Ct-1	2^∆Ct-2	2^∆Ct-3	AVG	SD	Fold-1	Fold-2	Fold-3	AVG	SD	p value			Gene	Sample	Ct1	Ct2	Ct3	∆Ct-1	∆Ct-2	∆Ct-3	2^∆Ct-1	2^∆Ct-2	2^∆Ct-3	AVG	SD	Fold-1	Fold-2	Fold-3	AVG	SD	p value
ACTB	siNC	16.04	15.77	15.75																	ACTB	siNC	18.17	17.85	17.78
	siCul3#1	15.35	15.51	15.64																		siCul3#1	17.14	17.4	17.36
	siCul3#2	14.13	14.35	14.27																		siCul3#2	16.05	16.03	16.02
ARIH1	siNC	19.97	19.9	20	-4.12	-4.05	-4.15	0.0575117	0.060371	0.0563282	0.0580703	0.00207851	0.990381	1.03962	0.969999	1	0.035793				ARIH1	siNC	23.14	23.22	23.2	-5.21	-5.29	-5.27	0.0270168	0.0255594	0.0259162	0.0261642	0.000759648	1.03259	0.976888	0.990524	1	0.0290339
	siCul3#1	20.93	20.98	20.85	-5.43	-5.48	-5.35	0.0231957	0.0224056	0.0245183	0.0233732	0.00106747	0.399441	0.385835	0.422217	0.402498	0.0183825	1.3574e-05	***			siCul3#1	23.1	23.14	23.1	-5.8	-5.84	-5.8	0.0179484	0.0174576	0.0179484	0.0177848	0.000283364	0.685992	0.667234	0.685992	0.67974	0.0108302	5.72391e-05	***
	siCul3#2	19.69	19.8	19.83	-5.44	-5.55	-5.58	0.0230355	0.0213444	0.0209051	0.0217617	0.0011248	0.396682	0.367561	0.359997	0.374747	0.0193696	1.18548e-05	***			siCul3#2	21.73	21.79	21.73	-5.7	-5.76	-5.7	0.0192366	0.018453	0.0192366	0.0189754	0.000452424	0.735228	0.705278	0.735228	0.725245	0.0172917	0.000147563	***
COMMD3	siNC	19.5	19.25	19.38	-3.65	-3.4	-3.53	0.07966	0.0947323	0.0865693	0.0869872	0.00754481	0.915767	1.08904	0.995196	1	0.0867347				COMMD3	siNC	21.74	21.8	21.85	-3.81	-3.87	-3.92	0.0712977	0.0683934	0.0660636	0.0685849	0.0026223	1.03955	0.997207	0.963239	1	0.0382344
	siCul3#1	19.7	19.8	19.69	-4.2	-4.3	-4.19	0.0544094	0.0507658	0.0547879	0.053321	0.00222098	0.625487	0.5836	0.629838	0.612975	0.0255322	0.001766	**			siCul3#1	22.02	22	22.07	-4.72	-4.7	-4.77	0.0379436	0.0384733	0.0366511	0.0376893	0.00093732	0.553235	0.560958	0.53439	0.549528	0.0136666	4.32207e-05	***
	siCul3#2	18.97	18.83	18.92	-4.72	-4.58	-4.67	0.0379436	0.0418102	0.0392817	0.0396785	0.00196363	0.436197	0.480648	0.45158	0.456142	0.0225738	0.00046334	***			siCul3#2	21.27	21.17	21.12	-5.24	-5.14	-5.09	0.0264608	0.02836	0.0293601	0.0280603	0.0014727	0.385811	0.413502	0.428084	0.409132	0.0214726	1.99795e-05	***
EGLN1	siNC	31.75	31.87	31.45	-15.9	-16.02	-15.6	1.6354e-05	1.50487e-05	2.01341e-05	1.71789e-05	2.64115e-06	0.951978	0.875999	1.17202	1	0.153744				EGLN1	siNC	30.43	30.93	30.68	-12.5	-13	-12.75	0.000172633	0.00012207	0.000145167	0.000146624	2.5313e-05	1.17739	0.832542	0.990065	1	0.17264
	siCul3#1	31.86	32.2	31.93	-16.36	-16.7	-16.43	1.18891e-05	9.39289e-06	1.1326e-05	1.08693e-05	1.30927e-06	0.692075	0.546768	0.659297	0.632713	0.0762139	0.0207033	*			siCul3#1	32.44	31.86	32.46	-15.14	-14.56	-15.16	2.76953e-05	4.14003e-05	2.7314e-05	3.21365e-05	8.02491e-06	0.188887	0.282358	0.186287	0.219177	0.0547314	0.00171882	**
	siCul3#2	32.83	31.22	32.85	-18.58	-16.97	-18.6	2.55189e-06	7.7897e-06	2.51676e-06	4.28612e-06	3.03424e-06	0.148548	0.453445	0.146503	0.249499	0.176626	0.00515272	**			siCul3#2	30.75	30.08	30.61	-14.72	-14.05	-14.58	3.70543e-05	5.89561e-05	4.08303e-05	4.56136e-05	1.17082e-05	0.252717	0.402091	0.27847	0.311093	0.079852	0.00329617	**
Expression of Cul 3-related genes after Cul3 knockdown (by RT-qPCR)																					Expression of Cul 3-related genes after Cul3 knockdown (by RT-qPCR)
213A-FR																					213A-GR
Gene	Sample	Ct1	Ct2	Ct3	∆Ct-1	∆Ct-2	∆Ct-3	2^∆Ct-1	2^∆Ct-2	2^∆Ct-3	AVG	SD	Fold-1	Fold-2	Fold-3	AVG	SD	p value			Gene	Sample	Ct1	Ct2	Ct3	∆Ct-1	∆Ct-2	∆Ct-3	2^∆Ct-1	2^∆Ct-2	2^∆Ct-3	AVG	SD	Fold-1	Fold-2	Fold-3	AVG	SD	p value
ACTB	siNC	16.46	16.58	16.46	16.5																ACTB	siNC	15.24	14.88	14.99	15.0367
	siCul3#1	16.3	16.44	16.31	16.35																	siCul3#1	14.45	14.48	14.6	14.51
	siCul3#2	16.58	16.53	16.4	16.5033																	siCul3#2	14.53	14.37	14.43	14.4433
DHX9	siNC	20.21	20.24	20.18	-3.71	-3.74	-3.68	0.076415	0.0748424	0.0780207	0.076426	0.00158915	0.999856	0.979279	1.02086	1	0.0207933				DHX9	siNC	20.02	20.18	20.21	-4.98	-5.14	-5.17	0.0316862	0.02836	0.0277763	0.0292742	0.00210918	1.0824	0.968771	0.948834	1	0.0720493
	siCul3#1	20.48	20.47	20.46	-4.13	-4.12	-4.11	0.0571145	0.0575117	0.0579118	0.0575126	0.000398645	0.747317	0.752515	0.757749	0.752527	0.00521609	3.69224e-05	***			siCul3#1	20.17	20.18	20.24	-5.66	-5.67	-5.73	0.0197774	0.0196408	0.0188407	0.0194197	0.000505999	0.675594	0.670927	0.643596	0.663372	0.0172848	0.0014095	***
	siCul3#2	20.79	20.73	20.7	-4.29	-4.23	-4.2	0.0511189	0.0532897	0.0544094	0.0529393	0.00167301	0.668867	0.697271	0.711922	0.692687	0.0218906	6.07989e-05	***			siCul3#2	20.67	20.51	20.43	-6.23	-6.07	-5.99	0.0133224	0.014885	0.0157337	0.014647	0.00122311	0.455091	0.508467	0.537459	0.500339	0.0417813	0.000484366	***
PSMD13	siNC	20.4	20.43	20.44	-3.9	-3.93	-3.94	0.0669858	0.0656073	0.0651541	0.0659157	0.000954027	1.01623	0.99532	0.988445	1	0.0144734				PSMD13	siNC	19.7	19.84	19.97	-4.66	-4.8	-4.93	0.0395549	0.0358968	0.0328036	0.0360851	0.00337956	1.09616	0.994782	0.909063	1	0.0936552
	siCul3#1	20.47	20.6	20.49	-4.12	-4.25	-4.14	0.0575117	0.052556	0.0567199	0.0555959	0.00266221	0.872504	0.797321	0.860492	0.843439	0.0403881	0.00320566	**			siCul3#1	19.76	19.78	19.71	-5.25	-5.27	-5.2	0.026278	0.0259162	0.0272047	0.0264663	0.000664554	0.728223	0.718197	0.753904	0.733441	0.0184163	0.00841789	**
	siCul3#2	20.6	20.47	20.54	-4.1	-3.97	-4.04	0.0583146	0.0638133	0.0607909	0.0609729	0.00275386	0.884683	0.968103	0.922252	0.925013	0.0417785	0.0424936	*			siCul3#2	19.75	19.73	19.71	-5.31	-5.29	-5.27	0.0252076	0.0255594	0.0259162	0.0255611	0.000354343	0.698558	0.70831	0.718197	0.708355	0.00981965	0.00582971	***
SNRPG	siNC	17.87	17.93	17.86	-1.37	-1.43	-1.36	0.386891	0.371131	0.389582	0.382535	0.00996732	1.01139	0.970189	1.01842	1	0.026056				SNRPG	siNC	17.86	17.84	17.74	-2.82	-2.8	-2.7	0.14161	0.143587	0.153893	0.146364	0.00659517	0.967525	0.981031	1.05144	1	0.0450602
	siCul3#1	18.12	18.02	17.97	-1.77	-1.67	-1.62	0.293209	0.314253	0.325335	0.310933	0.0163188	0.766489	0.821503	0.850473	0.812821	0.0426596	0.00291377	**			siCul3#1	17.72	17.76	17.78	-3.21	-3.25	-3.27	0.108067	0.105112	0.103665	0.105615	0.00224374	0.738347	0.718157	0.70827	0.721591	0.0153299	0.000534299	***
	siCul3#2	18.34	18.35	18.24	-1.84	-1.85	-1.74	0.279322	0.277392	0.29937	0.285361	0.0121699	0.730187	0.725143	0.782595	0.745975	0.0318139	0.000432345	***			siCul3#2	17.92	17.87	17.85	-3.48	-3.43	-3.41	0.0896222	0.0927827	0.0940779	0.0921609	0.00229201	0.612326	0.633919	0.642769	0.629671	0.0156597	0.000176979	***
Statistic analysis																					Statistic analysis
Expresion of ARIH1 after knockdown Cul3 on KKU-213A-FR																					Expresion of ARIH1 after knockdown Cul3 on KKU-213A-GR
Descriptives (Fold)																					Descriptives (Fold)
	N	Mean	Std. Deviation	Std. Error	95% Confidence Interval for Mean		Minimum	Maximum														N	Mean	Std. Deviation	Std. Error	95% Confidence Interval for Mean		Minimum	Maximum
					Lower Bound	Upper Bound																				Lower Bound	Upper Bound
siNC	3	1	0.035793	0.0206651	0.911085	1.08891	0.969999	1.03962													siNC	3	1	0.0290339	0.0167627	0.927876	1.07212	0.976888	1.03259
siCul3#1	3	0.402498	0.0183825	0.0106131	0.356833	0.448162	0.385835	0.422217													siCul3#1	3	0.67974	0.0108302	0.00625283	0.652836	0.706643	0.667234	0.685992
siCul3#2	3	0.374747	0.0193696	0.011183	0.32663	0.422863	0.359997	0.396682													siCul3#2	3	0.725245	0.0172917	0.00998339	0.68229	0.7682	0.705278	0.735228
Total	9	0.592415	0.306739	0.102246	0.356634	0.828195	0.359997	1.03962													Total	9	0.801662	0.151099	0.0503662	0.685517	0.917806	0.667234	1.03259
Tests of Homogeneity of Variances																					Tests of Homogeneity of Variances
		Levene Statistic	df1	df2	Sig.																		Levene Statistic	df1	df2	Sig.
Fold	Based on Mean	1.29374	2	6	0.341079																Fold	Based on Mean	2.27412	2	6	0.184041
	Based on Median	0.375543	2	6	0.701993																	Based on Median	0.409228	2	6	0.68139
	Based on Median and with adjusted df	0.375543	2	4.25317	0.70763																	Based on Median and with adjusted df	0.409228	2	4.87749	0.68502
	Based on trimmed mean	1.20092	2	6	0.364192																	Based on trimmed mean	2.00585	2	6	0.215244
ANOVA (Fold)																					ANOVA (Fold)
	Sum of Squares	df	Mean Square	F	Sig.																	Sum of Squares	df	Mean Square	F	Sig.
Between Groups	0.748721	2	0.37436	563.165	1.48777e-07	***															Between Groups	0.180128	2	0.0900639	214.563	2.62186e-06
Within Groups	0.00398846	6	0.000664744																		Within Groups	0.00251853	6	0.000419755
Total	0.752709	8																			Total	0.182646	8
Post Hoc Tests																					Post Hoc Tests
Multiple Comparisons																					Multiple Comparisons
Dependent Variable: Fold																					Dependent Variable: Fold
Scheffe																					Scheffe
(I) ARIH1	(J) ARIH1	Mean Difference (I-J)	Std. Error	Sig.	95% Confidence Interval																(I) ARIH1	(J) ARIH1	Mean Difference (I-J)	Std. Error	Sig.	95% Confidence Interval
					Lower Bound	Upper Bound																				Lower Bound	Upper Bound
siNC	siCul3#1	.5975023*	0.0210514	4.04053e-07	0.529985	0.66502	***														siNC	siCul3#1	.3202604*	0.0167283	4.17824e-06	0.266608	0.373912	***
	siCul3#2	.6252533*	0.0210514	3.08302e-07	0.557736	0.692771	***															siCul3#2	.2747549*	0.0167283	1.02999e-05	0.221103	0.328407	***
siCul3#1	siNC	-.5975023*	0.0210514	4.04053e-07	-0.66502	-0.529985															siCul3#1	siNC	-.3202604*	0.0167283	4.17824e-06	-0.373912	-0.266608
	siCul3#2	0.027751	0.0210514	0.466235	-0.0397664	0.0952684																siCul3#2	-0.0455055	0.0167283	0.0897748	-0.0991575	0.00814657
siCul3#2	siNC	-.6252533*	0.0210514	3.08302e-07	-0.692771	-0.557736															siCul3#2	siNC	-.2747549*	0.0167283	1.02999e-05	-0.328407	-0.221103
	siCul3#1	-0.027751	0.0210514	0.466235	-0.0952684	0.0397664																siCul3#1	0.0455055	0.0167283	0.0897748	-0.00814657	0.0991575
*. The mean difference is significant at the 0.05 level.																					*. The mean difference is significant at the 0.05 level.
Homogeneous Subsets																					Homogeneous Subsets
Fold																					Fold
Scheffea																					Scheffea
ARIH1	N	Subset for alpha = 0.05																			ARIH1	N	Subset for alpha = 0.05
		1 (a)	2 (b)																				1 (a)	2 (b)
siCul3#2	3	0.374747																			siCul3#1	3	0.67974
siCul3#1	3	0.402498																			siCul3#2	3	0.725245
siNC	3		1																		siNC	3		1
Sig.		0.466235	1																		Sig.		0.0897748	1
Means for groups in homogeneous subsets are displayed.																					Means for groups in homogeneous subsets are displayed.
Expresion of COMMD3 after knockdown Cul3 on KKU-213A-FR																					Expresion of COMMD3 after knockdown Cul3 on KKU-213A-GR
Descriptives (Fold)																					Descriptives (Fold)
	N	Mean	Std. Deviation	Std. Error	95% Confidence Interval for Mean		Minimum	Maximum														N	Mean	Std. Deviation	Std. Error	95% Confidence Interval for Mean		Minimum	Maximum
					Lower Bound	Upper Bound																				Lower Bound	Upper Bound
siNC	3	1	0.0867347	0.0500763	0.784539	1.21546	0.915767	1.08904													siNC	3	1	0.0382344	0.0220747	0.90502	1.09498	0.963239	1.03955
siCul3#1	3	0.612975	0.0255322	0.014741	0.54955	0.676401	0.5836	0.629838													siCul3#1	3	0.549528	0.0136666	0.00789039	0.515578	0.583477	0.53439	0.560958
siCul3#2	3	0.456142	0.0225738	0.013033	0.400065	0.512218	0.436197	0.480648													siCul3#2	3	0.409132	0.0214726	0.0123972	0.355791	0.462473	0.385811	0.428084
Total	9	0.689706	0.246864	0.0822881	0.499949	0.879462	0.436197	1.08904													Total	9	0.652887	0.268324	0.0894412	0.446635	0.859138	0.385811	1.03955
Tests of Homogeneity of Variances																					Tests of Homogeneity of Variances
		Levene Statistic	df1	df2	Sig.																		Levene Statistic	df1	df2	Sig.
Fold	Based on Mean	2.13101	2	6	0.199873																Fold	Based on Mean	1.12049	2	6	0.385938
	Based on Median	1.65543	2	6	0.267598																	Based on Median	0.824364	2	6	0.48271
	Based on Median and with adjusted df	1.65543	2	3.17221	0.321842																	Based on Median and with adjusted df	0.824364	2	4.13383	0.499702
	Based on trimmed mean	2.10731	2	6	0.202669																	Based on trimmed mean	1.10312	2	6	0.390861
ANOVA (Fold)																					ANOVA (Fold)
	Sum of Squares	df	Mean Square	F	Sig.																	Sum of Squares	df	Mean Square	F	Sig.
Between Groups	0.470167	2	0.235083	81.2091	4.52154e-05	***															Between Groups	0.571761	2	0.285881	406.519	3.93134e-07	***
Within Groups	0.0173687	6	0.00289479																		Within Groups	0.00421944	6	0.00070324
Total	0.487536	8																			Total	0.575981	8
Post Hoc Tests																					Post Hoc Tests
Multiple Comparisons																					Multiple Comparisons
Dependent Variable: Fold																					Dependent Variable: Fold
Scheffe																					Scheffe
(I) COMMD3	(J) COMMD3	Mean Difference (I-J)	Std. Error	Sig.	95% Confidence Interval																(I) COMMD3	(J) COMMD3	Mean Difference (I-J)	Std. Error	Sig.	95% Confidence Interval
					Lower Bound	Upper Bound																				Lower Bound	Upper Bound
siNC	siCul3#1	.3870248*	0.0439302	0.000369475	0.246129	0.52792	***														siNC	siCul3#1	.4504722*	0.0216524	2.55591e-06	0.381027	0.519917	***
	siCul3#2	.5438583*	0.0439302	5.34669e-05	0.402963	0.684754	***															siCul3#2	.5908679*	0.0216524	5.10614e-07	0.521423	0.660313	***
siCul3#1	siNC	-.3870248*	0.0439302	0.000369475	-0.52792	-0.246129															siCul3#1	siNC	-.4504722*	0.0216524	2.55591e-06	-0.519917	-0.381027
	siCul3#2	.1568336*	0.0439302	0.0327923	0.0159381	0.297729	*															siCul3#2	.1403958*	0.0216524	0.00194786	0.0709509	0.209841	**
siCul3#2	siNC	-.5438583*	0.0439302	5.34669e-05	-0.684754	-0.402963															siCul3#2	siNC	-.5908679*	0.0216524	5.10614e-07	-0.660313	-0.521423
	siCul3#1	-.1568336*	0.0439302	0.0327923	-0.297729	-0.0159381																siCul3#1	-.1403958*	0.0216524	0.00194786	-0.209841	-0.0709509
*. The mean difference is significant at the 0.05 level.																					*. The mean difference is significant at the 0.05 level.
Homogeneous Subsets																					Homogeneous Subsets
Fold																					Fold
Scheffea																					Scheffea
COMMD3	N	Subset for alpha = 0.05																			COMMD3	N	Subset for alpha = 0.05
		1 (a)	2 (b)	3 (c)																			1 (a)	2 (b)	3 (c)
siCul3#2	3	0.456142																			siCul3#2	3	0.409132
siCul3#1	3		0.612975																		siCul3#1	3		0.549528
siNC	3			1																	siNC	3			1
Sig.		1	1	1																	Sig.		1	1	1
Means for groups in homogeneous subsets are displayed.																					Means for groups in homogeneous subsets are displayed.
Expresion of EGLN1 after knockdown Cul3 on KKU-213A-FR																					Expresion of EGLN1 after knockdown Cul3 on KKU-213A-GR
Descriptives (Fold)																					Descriptives (Fold)
	N	Mean	Std. Deviation	Std. Error	95% Confidence Interval for Mean		Minimum	Maximum														N	Mean	Std. Deviation	Std. Error	95% Confidence Interval for Mean		Minimum	Maximum
					Lower Bound	Upper Bound																				Lower Bound	Upper Bound
siNC	3	1	0.153744	0.088764	0.618079	1.38192	0.875999	1.17202													siNC	3	1	0.17264	0.0996736	0.571139	1.42886	0.832542	1.17739
siCul3#1	3	0.632713	0.0762139	0.0440021	0.443388	0.822039	0.546768	0.692075													siCul3#1	3	0.219177	0.0547314	0.0315992	0.0832167	0.355137	0.186287	0.282358
siCul3#2	3	0.249499	0.176626	0.101975	-0.189264	0.688262	0.146503	0.453445													siCul3#2	3	0.311093	0.079852	0.0461026	0.11273	0.509456	0.252717	0.402091
Total	9	0.627404	0.347543	0.115848	0.360259	0.894549	0.146503	1.17202													Total	9	0.51009	0.382603	0.127534	0.215996	0.804184	0.186287	1.17739
Tests of Homogeneity of Variances																					Tests of Homogeneity of Variances
		Levene Statistic	df1	df2	Sig.																		Levene Statistic	df1	df2	Sig.
Fold	Based on Mean	1.80396	2	6	0.243537																Fold	Based on Mean	1.41656	2	6	0.31341
	Based on Median	0.175028	2	6	0.84357																	Based on Median	0.996375	2	6	0.423024
	Based on Median and with adjusted df	0.175028	2	3.89979	0.845681																	Based on Median and with adjusted df	0.996375	2	4.60477	0.436948
	Based on trimmed mean	1.52623	2	6	0.291175																	Based on trimmed mean	1.3967	2	6	0.317676
ANOVA (Fold)																					ANOVA (Fold)
	Sum of Squares	df	Mean Square	F	Sig.																	Sum of Squares	df	Mean Square	F	Sig.
Between Groups	0.845005	2	0.422503	20.9013	0.00197741	**															Between Groups	1.09273	2	0.546363	41.8388	0.000299504	***
Within Groups	0.121285	6	0.0202141																		Within Groups	0.0783527	6	0.0130588
Total	0.96629	8																			Total	1.17108	8
Post Hoc Tests																					Post Hoc Tests
Multiple Comparisons																					Multiple Comparisons
Dependent Variable: Fold																					Dependent Variable: Fold
Scheffe																					Scheffe
(I) EGLN1	(J) EGLN1	Mean Difference (I-J)	Std. Error	Sig.	95% Confidence Interval																(I) EGLN1	(J) EGLN1	Mean Difference (I-J)	Std. Error	Sig.	95% Confidence Interval
					Lower Bound	Upper Bound																				Lower Bound	Upper Bound
siNC	siCul3#1	0.367287	0.116087	0.0526329	-0.00503307	0.739606															siNC	siCul3#1	.7808229*	0.0933052	0.000491441	0.481569	1.08008	***
	siCul3#2	.7505013*	0.116087	0.00197819	0.378182	1.12282	**															siCul3#2	.6889070*	0.0933052	0.000974722	0.389653	0.988161	***
siCul3#1	siNC	-0.367287	0.116087	0.0526329	-0.739606	0.00503307															siCul3#1	siNC	-.7808229*	0.0933052	0.000491441	-1.08008	-0.481569
	siCul3#2	.3832147*	0.116087	0.0447712	0.0108951	0.755534	*															siCul3#2	-0.0919159	0.0933052	0.637783	-0.39117	0.207338
siCul3#2	siNC	-.7505013*	0.116087	0.00197819	-1.12282	-0.378182															siCul3#2	siNC	-.6889070*	0.0933052	0.000974722	-0.988161	-0.389653
	siCul3#1	-.3832147*	0.116087	0.0447712	-0.755534	-0.0108951																siCul3#1	0.0919159	0.0933052	0.637783	-0.207338	0.39117
*. The mean difference is significant at the 0.05 level.																					*. The mean difference is significant at the 0.05 level.
Homogeneous Subsets																					Homogeneous Subsets
Fold																					Fold
Scheffea																					Scheffea
EGLN1	N	Subset for alpha = 0.05																			EGLN1	N	Subset for alpha = 0.05
		1 (a)	2 (b)																				1 (a)	2 (b)
siCul3#2	3	0.249499																			siCul3#1	3	0.219177
siCul3#1	3		0.632713																		siCul3#2	3	0.311093
siNC	3		1																		siNC	3		1
Sig.		1	0.0526329																		Sig.		0.637783	1
Means for groups in homogeneous subsets are displayed.																					Means for groups in homogeneous subsets are displayed.
Expresion of DHX9 after knockdown Cul3 on KKU-213A-FR																					Expresion of DHX9 after knockdown Cul3 on KKU-213A-GR
Descriptives (Fold)																					Descriptives (Fold)
	N	Mean	Std. Deviation	Std. Error	95% Confidence Interval for Mean		Minimum	Maximum														N	Mean	Std. Deviation	Std. Error	95% Confidence Interval for Mean		Minimum	Maximum
					Lower Bound	Upper Bound																				Lower Bound	Upper Bound
siNC	3	1	0.0207933	0.012005	0.948347	1.05165	0.979279	1.02086													siNC	3	1	0.0720493	0.0415977	0.82102	1.17898	0.948834	1.0824
siCul3#1	3	0.752527	0.00521609	0.00301151	0.739569	0.765484	0.747317	0.757749													siCul3#1	3	0.663372	0.0172848	0.00997939	0.620434	0.70631	0.643596	0.675594
siCul3#2	3	0.692687	0.0218906	0.0126385	0.638308	0.747066	0.668867	0.711922													siCul3#2	3	0.500339	0.0417813	0.0241225	0.396549	0.60413	0.455091	0.537459
Total	9	0.815071	0.141925	0.0473085	0.705978	0.924165	0.668867	1.02086													Total	9	0.721237	0.22473	0.0749101	0.548494	0.89398	0.455091	1.0824
Tests of Homogeneity of Variances																					Tests of Homogeneity of Variances
		Levene Statistic	df1	df2	Sig.																		Levene Statistic	df1	df2	Sig.
Fold	Based on Mean	1.58481	2	6	0.280157																Fold	Based on Mean	3.65955	2	6	0.0914175
	Based on Median	0.956337	2	6	0.435997																	Based on Median	0.559571	2	6	0.598647
	Based on Median and with adjusted df	0.956337	2	4.09337	0.456259																	Based on Median and with adjusted df	0.559571	2	3.01177	0.621379
	Based on trimmed mean	1.54417	2	6	0.28774																	Based on trimmed mean	3.22553	2	6	0.111901
ANOVA (Fold)																					ANOVA (Fold)
	Sum of Squares	df	Mean Square	F	Sig.																	Sum of Squares	df	Mean Square	F	Sig.
Between Groups	0.159265	2	0.0796325	254.48	1.58173e-06	***															Between Groups	0.389559	2	0.194779	80.7594	4.59477e-05	***
Within Groups	0.00187753	6	0.000312922																		Within Groups	0.0144711	6	0.00241185
Total	0.161142	8																			Total	0.40403	8
Post Hoc Tests																					Post Hoc Tests
Multiple Comparisons																					Multiple Comparisons
Dependent Variable: Fold																					Dependent Variable: Fold
Scheffe																					Scheffe
(I) DHX9	(J) DHX9	Mean Difference (I-J)	Std. Error	Sig.	95% Confidence Interval																(I) DHX9	(J) DHX9	Mean Difference (I-J)	Std. Error	Sig.	95% Confidence Interval
					Lower Bound	Upper Bound																				Lower Bound	Upper Bound
siNC	siCul3#1	.2474730*	0.0144435	8.03454e-06	0.201149	0.293797	***														siNC	siCul3#1	.3366278*	0.0400986	0.000482923	0.208021	0.465234	***
	siCul3#2	.3073129*	0.0144435	2.23794e-06	0.260989	0.353637	***															siCul3#2	.4996607*	0.0400986	5.1497e-05	0.371054	0.628267	***
siCul3#1	siNC	-.2474730*	0.0144435	8.03454e-06	-0.293797	-0.201149															siCul3#1	siNC	-.3366278*	0.0400986	0.000482923	-0.465234	-0.208021
	siCul3#2	.0598399*	0.0144435	0.0173769	0.0135159	0.106164	*															siCul3#2	.1630328*	0.0400986	0.0188855	0.0344262	0.291639	*
siCul3#2	siNC	-.3073129*	0.0144435	2.23794e-06	-0.353637	-0.260989															siCul3#2	siNC	-.4996607*	0.0400986	5.1497e-05	-0.628267	-0.371054
	siCul3#1	-.0598399*	0.0144435	0.0173769	-0.106164	-0.0135159																siCul3#1	-.1630328*	0.0400986	0.0188855	-0.291639	-0.0344262
*. The mean difference is significant at the 0.05 level.																					*. The mean difference is significant at the 0.05 level.
Homogeneous Subsets																					Homogeneous Subsets
Fold																					Fold
Scheffea																					Scheffea
DHX9	N	Subset for alpha = 0.05																			DHX9	N	Subset for alpha = 0.05
		1 (a)	2 (b)	3 (c)																			1 (a)	2 (b)	3 (c)
siCul3#2	3	0.692687																			siCul3#2	3	0.500339
siCul3#1	3		0.752527																		siCul3#1	3		0.663372
siNC	3			1																	siNC	3			1
Sig.		1	1	1																	Sig.		1	1	1
Means for groups in homogeneous subsets are displayed.																					Means for groups in homogeneous subsets are displayed.
Expresion of PSMD13 after knockdown Cul3 on KKU-213A-FR																					Expresion of PSMD13 after knockdown Cul3 on KKU-213A-GR
Descriptives (Fold)																					Descriptives (Fold)
	N	Mean	Std. Deviation	Std. Error	95% Confidence Interval for Mean		Minimum	Maximum														N	Mean	Std. Deviation	Std. Error	95% Confidence Interval for Mean		Minimum	Maximum
					Lower Bound	Upper Bound																				Lower Bound	Upper Bound
siNC	3	1	0.0144734	0.00835624	0.964046	1.03595	0.988445	1.01623													siNC	3	1	0.0936552	0.0540719	0.767348	1.23265	0.909063	1.09616
siCul3#1	3	0.843439	0.0403881	0.0233181	0.743109	0.943768	0.797321	0.872504													siCul3#1	3	0.733441	0.0184163	0.0106327	0.687693	0.77919	0.718197	0.753904
siCul3#2	3	0.925013	0.0417785	0.0241208	0.821229	1.0288	0.884683	0.968103													siCul3#2	3	0.708355	0.00981965	0.00566938	0.683962	0.732748	0.698558	0.718197
Total	9	0.922817	0.0741291	0.0247097	0.865837	0.979798	0.797321	1.01623													Total	9	0.813932	0.147967	0.0493223	0.700195	0.927669	0.698558	1.09616
Tests of Homogeneity of Variances																					Tests of Homogeneity of Variances
		Levene Statistic	df1	df2	Sig.																		Levene Statistic	df1	df2	Sig.
Fold	Based on Mean	1.43412	2	6	0.309701																Fold	Based on Mean	3.28287	2	6	0.108865
	Based on Median	0.490994	2	6	0.634624																	Based on Median	2.68608	2	6	0.146867
	Based on Median and with adjusted df	0.490994	2	4.12157	0.643781																	Based on Median and with adjusted df	2.68608	2	2.26971	0.252157
	Based on trimmed mean	1.34928	2	6	0.32818																	Based on trimmed mean	3.24859	2	6	0.110667
ANOVA (Fold)																					ANOVA (Fold)
	Sum of Squares	df	Mean Square	F	Sig.																	Sum of Squares	df	Mean Square	F	Sig.
Between Groups	0.0367888	2	0.0183944	15.388	0.0043427	**															Between Groups	0.15674	2	0.0783698	25.5363	0.00116191	**
Within Groups	0.00717224	6	0.00119537																		Within Groups	0.0184138	6	0.00306896
Total	0.043961	8																			Total	0.175153	8
Post Hoc Tests																					Post Hoc Tests
Multiple Comparisons																					Multiple Comparisons
Dependent Variable: Fold																					Dependent Variable: Fold
Scheffe																					Scheffe
(I) PSMD13	(J) PSMD13	Mean Difference (I-J)	Std. Error	Sig.	95% Confidence Interval																(I) PSMD13	(J) PSMD13	Mean Difference (I-J)	Std. Error	Sig.	95% Confidence Interval
					Lower Bound	Upper Bound																				Lower Bound	Upper Bound
siNC	siCul3#1	.1565612*	0.0282297	0.00434914	0.0660213	0.247101	**														siNC	siCul3#1	.2665587*	0.0452325	0.00319713	0.121487	0.411631	**
	siCul3#2	0.0749871	0.0282297	0.0970554	-0.0155528	0.165527																siCul3#2	.2916450*	0.0452325	0.00200622	0.146573	0.436717	**
siCul3#1	siNC	-.1565612*	0.0282297	0.00434914	-0.247101	-0.0660213															siCul3#1	siNC	-.2665587*	0.0452325	0.00319713	-0.411631	-0.121487
	siCul3#2	-0.0815741	0.0282297	0.073095	-0.172114	0.00896581																siCul3#2	0.0250863	0.0452325	0.860723	-0.119986	0.170158	*
siCul3#2	siNC	-0.0749871	0.0282297	0.0970554	-0.165527	0.0155528															siCul3#2	siNC	-.2916450*	0.0452325	0.00200622	-0.436717	-0.146573
	siCul3#1	0.0815741	0.0282297	0.073095	-0.00896581	0.172114																siCul3#1	-0.0250863	0.0452325	0.860723	-0.170158	0.119986
*. The mean difference is significant at the 0.05 level.																					*. The mean difference is significant at the 0.05 level.
Homogeneous Subsets																					Homogeneous Subsets
Fold																					Fold
Scheffea																					Scheffea
PSMD13	N	Subset for alpha = 0.05																			PSMD13	N	Subset for alpha = 0.05
		1 (a)	2 (b)																				1 (a)	2 (b)
siCul3#1	3	0.843439																			siCul3#2	3	0.708355
siCul3#2	3	0.925013	0.925013																		siCul3#1	3	0.733441
siNC	3		1																		siNC	3		1
Sig.		0.073095	0.0970554																		Sig.		0.860723	1
Means for groups in homogeneous subsets are displayed.																					Means for groups in homogeneous subsets are displayed.
Expresion of SNRPG after knockdown Cul3 on KKU-213A-FR																					Expresion of SNRPG after knockdown Cul3 on KKU-213A-GR
Descriptives (Fold)																					Descriptives (Fold)
	N	Mean	Std. Deviation	Std. Error	95% Confidence Interval for Mean		Minimum	Maximum														N	Mean	Std. Deviation	Std. Error	95% Confidence Interval for Mean		Minimum	Maximum
					Lower Bound	Upper Bound																				Lower Bound	Upper Bound
siNC	3	1	0.026056	0.0150434	0.935273	1.06473	0.970189	1.01842													siNC	3	1	0.0450602	0.0260155	0.888064	1.11194	0.967525	1.05144
siCul3#1	3	0.812821	0.0426596	0.0246295	0.706849	0.918794	0.766489	0.850473													siCul3#1	3	0.721591	0.0153299	0.00885072	0.68351	0.759673	0.70827	0.738347
siCul3#2	3	0.745975	0.0318139	0.0183678	0.666945	0.825005	0.725143	0.782595													siCul3#2	3	0.629671	0.0156597	0.00904113	0.59077	0.668572	0.612326	0.642769
Total	9	0.852932	0.117821	0.0392738	0.762367	0.943498	0.725143	1.01842													Total	9	0.783754	0.168866	0.0562886	0.653952	0.913556	0.612326	1.05144
Tests of Homogeneity of Variances																					Tests of Homogeneity of Variances
		Levene Statistic	df1	df2	Sig.																		Levene Statistic	df1	df2	Sig.
Fold	Based on Mean	0.464818	2	6	0.649116																Fold	Based on Mean	4.39876	2	6	0.0666634
	Based on Median	0.165703	2	6	0.851046																	Based on Median	0.593847	2	6	0.581681
	Based on Median and with adjusted df	0.165703	2	5.73132	0.851216																	Based on Median and with adjusted df	0.593847	2	2.64609	0.612293
	Based on trimmed mean	0.433066	2	6	0.667294																	Based on trimmed mean	3.83614	2	6	0.0845145
ANOVA (Fold)																					ANOVA (Fold)
	Sum of Squares	df	Mean Square	F	Sig.																	Sum of Squares	df	Mean Square	F	Sig.
Between Groups	0.104033	2	0.0520166	44.4475	0.000252769	***															Between Groups	0.223104	2	0.111552	133.294	1.06642e-05	***
Within Groups	0.00702176	6	0.00117029																		Within Groups	0.00502131	6	0.000836884
Total	0.111055	8																			Total	0.228125	8
Post Hoc Tests																					Post Hoc Tests
Multiple Comparisons																					Multiple Comparisons
Dependent Variable: Fold																					Dependent Variable: Fold
Scheffe																					Scheffe
(I) SNRPG	(J) SNRPG	Mean Difference (I-J)	Std. Error	Sig.	95% Confidence Interval																(I) SNRPG	(J) SNRPG	Mean Difference (I-J)	Std. Error	Sig.	95% Confidence Interval
					Lower Bound	Upper Bound																				Lower Bound	Upper Bound
siNC	siCul3#1	.1871785*	0.027932	0.00163733	0.0975934	0.276764	**														siNC	siCul3#1	.2784086*	0.0236204	7.09566e-05	0.202652	0.354165	***
	siCul3#2	.2540253*	0.027932	0.000309426	0.16444	0.34361	***															siCul3#2	.3703288*	0.0236204	1.35279e-05	0.294572	0.446086	***
siCul3#1	siNC	-.1871785*	0.027932	0.00163733	-0.276764	-0.0975934															siCul3#1	siNC	-.2784086*	0.0236204	7.09566e-05	-0.354165	-0.202652
	siCul3#2	0.0668468	0.027932	0.133921	-0.0227382	0.156432																siCul3#2	.0919202*	0.0236204	0.0228496	0.0161635	0.167677	*
siCul3#2	siNC	-.2540253*	0.027932	0.000309426	-0.34361	-0.16444															siCul3#2	siNC	-.3703288*	0.0236204	1.35279e-05	-0.446086	-0.294572
	siCul3#1	-0.0668468	0.027932	0.133921	-0.156432	0.0227382																siCul3#1	-.0919202*	0.0236204	0.0228496	-0.167677	-0.0161635
*. The mean difference is significant at the 0.05 level.																					*. The mean difference is significant at the 0.05 level.
Homogeneous Subsets																					Homogeneous Subsets
Fold																					Fold
Scheffea																					Scheffea
SNRPG	N	Subset for alpha = 0.05																			SNRPG	N	Subset for alpha = 0.05
		1 (a)	2 (b)																				1 (a)	2 (b)	3 (c)
siCul3#2	3	0.745975																			siCul3#2	3	0.629671
siCul3#1	3	0.812821																			siCul3#1	3		0.721591
siNC	3		1																		siNC	3			1
Sig.		0.133921	1																		Sig.		1	1	1
Means for groups in homogeneous subsets are displayed.																					Means for groups in homogeneous subsets are displayed.
